# Supplementary material
Source: publisher figshare collection journal article supplement (https://asha.figshare.com/ndownloader/files/23906588)

**Supplemental Material S1.** Student provision and response rates for graduate prompting levels from the Dynamic Measure of Morphological Awareness.

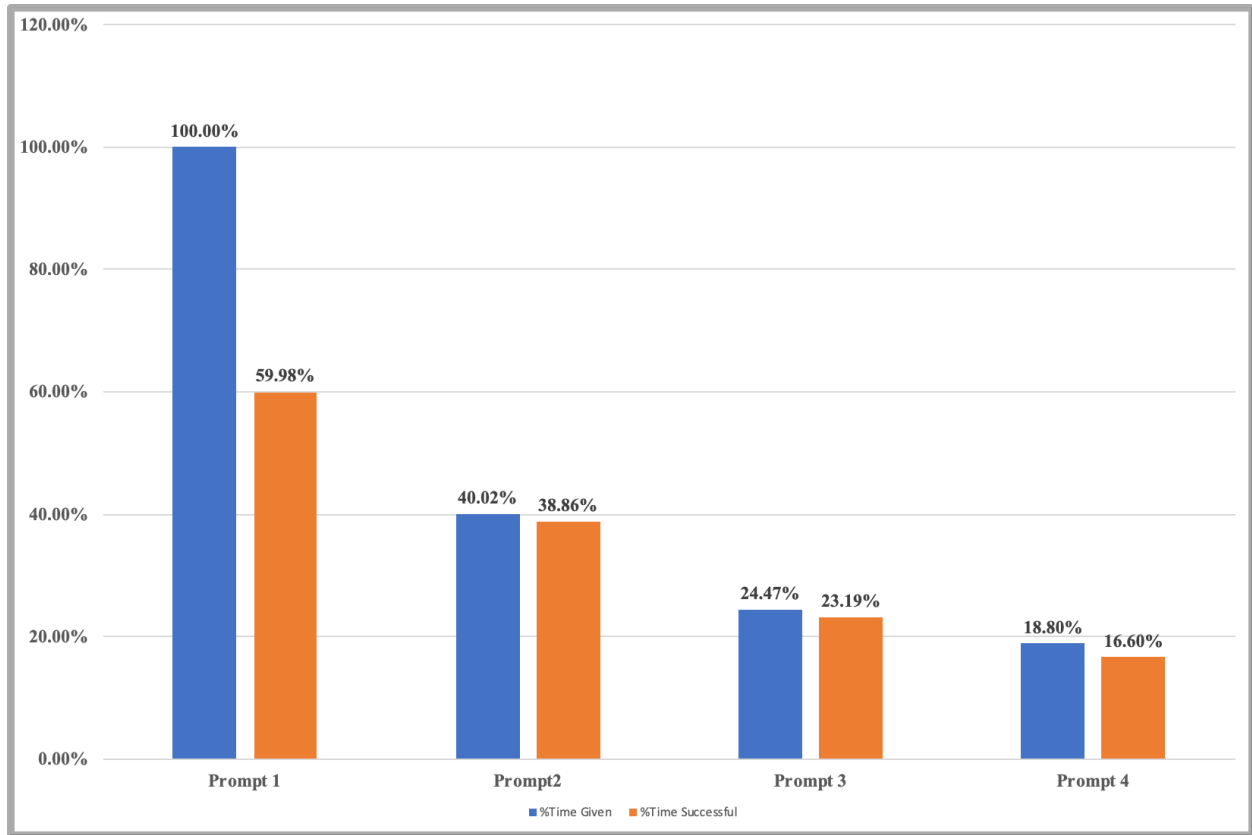

Supplement: Supplementary file 1 [file 23906588]
